# Supplementary material for: Safety engineered injection devices for intramuscular, subcutaneous and intradermal injections in healthcare delivery settings: a systematic review and meta-analysis
Source: PubMed Central journal article supplement (PMC4697323; doi:10.1186/s12912-015-0119-1), 2015-12-30
Supplement: 12912_2015_119_MOESM2_ESM.pdf [file 12912_2015_119_MOESM2_ESM.pdf]

Additional file 2: List of excluded studies and reasons for exclusion.

| <b>Study name</b>        | <b>Reason for exclusion</b>                                                                                                                                                  |
|--------------------------|------------------------------------------------------------------------------------------------------------------------------------------------------------------------------|
| Adams 2003 [23]          | Reporting on preferences, acceptability or feasibility                                                                                                                       |
| Azar-Cavanagh 2007[24]   | Evaluating intravenous injection or phlebotomy safety devices                                                                                                                |
| Beason 1992[25]          | Evaluating intravenous injection or phlebotomy safety devices                                                                                                                |
| Billiet 1991[28]         | Evaluating intravenous injection or phlebotomy safety devices                                                                                                                |
| Dugger 1992[30]          | Reporting economic analysis                                                                                                                                                  |
| Edwards 2012[31]         | Evaluating intravenous injection or phlebotomy safety devices                                                                                                                |
| Ford 2011[55]            | Reporting on preferences, acceptability or feasibility                                                                                                                       |
| Gartner 1992[32]         | Evaluating intravenous injection or phlebotomy safety devices                                                                                                                |
| Gershon 1999[33]         | Evaluating intravenous injection or phlebotomy safety devices                                                                                                                |
| Gil 2006 [27]            | Reporting economic analysis                                                                                                                                                  |
| Gomez 2010 [29]          | Evaluating intravenous injection or phlebotomy safety devices                                                                                                                |
| LaMontagne 2007[34]      | Evaluating intravenous injection or phlebotomy safety devices; also “quantitative use of SEDs could not be precisely estimated for intramuscular or subcutaneous injections” |
| Laufer 1994 [35]         | Reporting economic analysis                                                                                                                                                  |
| Lawrence 1997 [36]       | Evaluating intravenous injection or phlebotomy safety devices                                                                                                                |
| L’Ecuyer 1996 [37]       | Evaluating intravenous injection or phlebotomy safety devices                                                                                                                |
| MacPherson 1996[38]      | Evaluating intravenous injection or phlebotomy safety devices                                                                                                                |
| McCleary 2002[39]        | Evaluating intravenous injection or phlebotomy safety devices                                                                                                                |
| Mendelson 1998[40]       | Evaluating intravenous injection or phlebotomy safety devices                                                                                                                |
| MMWR 1997[26]            | Evaluating intravenous injection or phlebotomy safety devices                                                                                                                |
| Mulherin 1996 [41]       | Reporting on preferences, acceptability or feasibility                                                                                                                       |
| Orenstein 1995 [42]      | Reporting on preferences, acceptability or feasibility                                                                                                                       |
| Peate 2001[52]           | Evaluating glucometer lancets                                                                                                                                                |
| Pereira 2010[43]         | Reporting economic analysis                                                                                                                                                  |
| Puro 2010 [44]           | Evaluating intravenous injection or phlebotomy safety devices                                                                                                                |
| Rogues 2004 [45]         | Evaluating intravenous injection or phlebotomy safety devices                                                                                                                |
| Skolnick 1993 [46]       | Evaluating intravenous injection or phlebotomy safety devices                                                                                                                |
| Suzuki 2006 [56]         | Evaluating intravenous injection or phlebotomy safety devices                                                                                                                |
| Terrell 1993 [47]        | Evaluating intravenous injection or phlebotomy safety devices                                                                                                                |
| Vaudelle-Malbos 1996[48] | Reporting on preferences, acceptability or feasibility                                                                                                                       |
| Wolfrum 1994 [49]        | Evaluating intravenous injection or phlebotomy safety devices                                                                                                                |
| Yassi 1995 [50]          | Evaluating intravenous injection or phlebotomy safety devices                                                                                                                |
| Zakrzewska[51]           | Reporting data on SED not in the HCW setting                                                                                                                                 |
