# Supplementary material for: Safety engineered injection devices for intramuscular, subcutaneous and intradermal injections in healthcare delivery settings: a systematic review and meta-analysis
Source: PubMed Central journal article supplement (PMC4697323; doi:10.1186/s12912-015-0119-1), 2015-12-30
Supplement: 12912_2015_119_MOESM3_ESM.pdf [file 12912_2015_119_MOESM3_ESM.pdf]

**Additional file 3: Characteristics of included studies.**

| <b>Study Name and focus</b>                                                   | <b>Device</b>                                                                                                                                                                         | <b>Funding and conflicts of interest</b>                                                                                 | <b>Study Design</b>                                                                                                                                      | <b>Participants, setting</b>                                                                                                                                                 | <b>Intervention</b>                                                                                                                                 | <b>Control</b>                                                          | <b>Outcomes</b>                                                                                            |
|-------------------------------------------------------------------------------|---------------------------------------------------------------------------------------------------------------------------------------------------------------------------------------|--------------------------------------------------------------------------------------------------------------------------|----------------------------------------------------------------------------------------------------------------------------------------------------------|------------------------------------------------------------------------------------------------------------------------------------------------------------------------------|-----------------------------------------------------------------------------------------------------------------------------------------------------|-------------------------------------------------------------------------|------------------------------------------------------------------------------------------------------------|
| <p>Younger 1992 [15]</p> <p>Focus: Injury prevention and reuse prevention</p> | <p>Monoject™ Safety Syringe (Sherwood Medical). It consists of single use, 3 cc shielded syringe with hollow bore needle and a retractable plastic shield and restrictive collar.</p> | <p>Funding: “study supported in part by Sherwood Medical, St. Louis, Missouri”. Conflicts of interest: not reported.</p> | <p>Surveillance study, most likely prospective. Pre and post intervention analysis of NSI rates (Pre: April - July 1990; Post: July - October 1990).</p> | <p>9001 healthcare workers at three US medical centers (University of Virginia Health Sciences Center, a major public hospital and Pacific Presbyterian Medical Center).</p> | <p>Introduction of Monoject™ Safety Syringe. Workers received training (for ~ 2 weeks) in proper use and disposal of the 3 cc shielded syringe.</p> | <p>“Standard 3 cc syringe”.</p>                                         | <p>Incidence of NSI (self-reported) among HCWs.</p>                                                        |
| <p>Duesman 1998 [17]</p> <p>Focus: Injury prevention</p>                      | <p>VanishPoint®, a 3cc automated retraction syringe: “this causes the syringe's patented spring</p>                                                                                   | <p>Funding: not clearly reported; but “syringes had been purchased by the facilities”. Conflicts of</p>                  | <p>Retrospective study (survey collected data between Jan 9 and 13, 1998). Pre-Post Intervention NSI rates. Pre:</p>                                     | <p>All HCWs of 26 medical facilities: 10 acute care, 7 psychiatric-drug rehabilitation, 3 Public</p>                                                                         | <p>Implementation of Vanishpoint®, in all surveyed facilities accompanied with training given during the</p>                                        | <p>Commercially available 3cc syringe with a standard non-removable</p> | <p>Incidence of NSI (self-reporting to an employee assigned to document all reported NSIs) among HCWs.</p> |

|                                                                                                                                               |                                                                                                                            |                                                             |                                                                                                              |                                                                                                                                                                                  |                                              |                               |               |
|-----------------------------------------------------------------------------------------------------------------------------------------------|----------------------------------------------------------------------------------------------------------------------------|-------------------------------------------------------------|--------------------------------------------------------------------------------------------------------------|----------------------------------------------------------------------------------------------------------------------------------------------------------------------------------|----------------------------------------------|-------------------------------|---------------|
| and reuse prevention                                                                                                                          | mechanism to retract the needle directly from the patient into the empty syringe barrel after medication is administered.” | interest: not reported.                                     | 1996-1997; Post: 1997-1998.                                                                                  | Health, 2 correctional, 2 family/primary care, 1 research, and occupational health facilities. Further details about medical facilities not provided; most likely United States. | product evaluation period (throughout 1997). | needle.                       |               |
| Reddy 2001 [13]<br><br>Focus: Injury prevention<br><br>*Also assessed intravenous systems; data not provided separately for different devices | “Safety syringes and needless intravenous systems” (no further details provided).                                          | Funding: not reported. Conflicts of interest: not reported. | Retrospective study design. Before and after collection of data on NSI; Pre: 1994 – 1997; Post: 1997 – 1999. | HCW in nearly all departments in an 800 plus bed hospital in Texas, United States, including HCW with direct patient contact and ancillary workers; physicians not included.     | Implementation of safety engineered devices. | “Traditional needed devices.” | Rates of NSI. |

|                                                                                                                                                 |                                                                                                                                                                                                                                                |                                                                                                                                                                                                    |                                                                                                                      |                                                                                                                         |                                                                                                                                                                                     |                                                                                                    |                                                                                                                               |
|-------------------------------------------------------------------------------------------------------------------------------------------------|------------------------------------------------------------------------------------------------------------------------------------------------------------------------------------------------------------------------------------------------|----------------------------------------------------------------------------------------------------------------------------------------------------------------------------------------------------|----------------------------------------------------------------------------------------------------------------------|-------------------------------------------------------------------------------------------------------------------------|-------------------------------------------------------------------------------------------------------------------------------------------------------------------------------------|----------------------------------------------------------------------------------------------------|-------------------------------------------------------------------------------------------------------------------------------|
| <p>Sohn 2004 [19]</p> <p>Focus: Injury prevention</p> <p>*Also assessed intravenous systems; data provided separately for different devices</p> | <p>“Safer-needle system” was composed of “variety of safety-engineered devices from seven manufacturers to allow for needle-safe intravenous (IV) delivery, blood collection, IV insertion, and intramuscular and subcutaneous injection”.</p> | <p>Funding: National Institute of Allergy and Infectious Diseases; the Centers for Disease Control and Prevention; and the Prevention Epicenters Program. Conflicts of interest: not reported.</p> | <p>Prospective study. Before-and-after intervention trial: before: Jan 1998–Dec 2000; after: Feb 2001– Jan 2002.</p> | <p>Staff (about 4000 FTEs per year) at a 427-bed, tertiary-care hospital in Manhattan, United States.</p>               | <p>Implementation of the “safer-needle system”. All HCWs responsible for direct patient care were required to attend a training session in the months preceding implementation.</p> | <p>Unspecified “conventional devices”.</p>                                                         | <p>Incidence of percutaneous injuries (self-reported).</p>                                                                    |
| <p>Adams 2006 [14]</p> <p>Focus: Injury prevention</p>                                                                                          | <p>Safety needle devices consisted of hypodermic needle devices with safety feature requiring activation: Safety Glide™</p>                                                                                                                    | <p>Funding: educational grant by Becton Dickinson, Oxford, UK. Conflicts of interest: not reported.</p>                                                                                            | <p>Prospective cohort study. A four-year (2001-2004), pre and post intervention analysis of NSI rate.</p>            | <p>All HCW from 4 clinical areas (2 surgical, 1 medical and 1 outpatient) at the University Hospital Birmingham NHS</p> | <p>2002: enhanced training program. 2003:pilot evaluation of the safety needle devices. Late 2003 throughout 2004:</p>                                                              | <p>“Standard hypodermic needles” (2001); although standard needles used in 2002 and 2003 there</p> | <p>Incidence of NSI (data collected prospectively 2001 onwards from reports to the Trust’s occupational health and safety</p> |

|                                                                                                                                                |                                                                                                                                                |                                                                                                                                                              |                                                                                                                                                     |                                                                                                                |                                                                                                                                                                     |                                                                                        |                                                                                                                                        |
|------------------------------------------------------------------------------------------------------------------------------------------------|------------------------------------------------------------------------------------------------------------------------------------------------|--------------------------------------------------------------------------------------------------------------------------------------------------------------|-----------------------------------------------------------------------------------------------------------------------------------------------------|----------------------------------------------------------------------------------------------------------------|---------------------------------------------------------------------------------------------------------------------------------------------------------------------|----------------------------------------------------------------------------------------|----------------------------------------------------------------------------------------------------------------------------------------|
| <p>*Also assessed needles and blunt fill cannulae that appear to be for phlebotomy use; data not provided separately for different devices</p> | <p>needles, SafetyGlide™ TNT insulin units, blunt fill cannulae (Becton Dickinson, Temse, Belgium).</p>                                        |                                                                                                                                                              |                                                                                                                                                     | <p>Foundation Trust (number of participants not reported), United Kingdom.</p>                                 | <p>Introduction of the safety needle devices.</p>                                                                                                                   | <p>were co-interventions during that year (enhanced training and pilot evaluation)</p> | <p>department and risk management.</p>                                                                                                 |
| <p>Valls 2007 [22]</p> <p>Focus: Injury prevention</p> <p>*Also assessed</p>                                                                   | <p>Safety-engineered devices. Needles with sheaths for intramuscular and subcutaneous administration of drugs (Eclipse™, Becton-Dickinson;</p> | <p>Funding: Directorate General of Public Health of the Autonomous Community of Valencia, Spain. Conflicts of interest: “all authors report no conflicts</p> | <p>Prospective “quasi experimental” trial. Before-and-after intervention evaluation. Pre: October 2004 - March 2005; Post: October 2005 - March</p> | <p>75 nurses working on selected (and not all) wards of Hospital Virgen de la Salud-Elda; Alicante, Spain.</p> | <p>Safety-engineered devices introduced in October 2005. Nurses participated in a 2-hour training experience about the devices to be tested and ways to improve</p> | <p>Unspecified “conventional devices”.</p>                                             | <p>Incidence of NSI (voluntary self-reporting complimented with active surveillance and reporting by nurses in charge) among HCWs.</p> |

|                                                                                                                                                                                           |                                                                                                          |                                                                               |                                                                                                               |                                                                                                                      |                                                                                                                                                                                 |                                    |                                     |
|-------------------------------------------------------------------------------------------------------------------------------------------------------------------------------------------|----------------------------------------------------------------------------------------------------------|-------------------------------------------------------------------------------|---------------------------------------------------------------------------------------------------------------|----------------------------------------------------------------------------------------------------------------------|---------------------------------------------------------------------------------------------------------------------------------------------------------------------------------|------------------------------------|-------------------------------------|
| <p>vacuum phlebotomy systems, blood-gas syringes, lancets (with retractable, single-use puncture sticks), and intravascular catheters; data provided separately for different devices</p> | <p>Surshield™, Terumo).</p>                                                                              | <p>of interest relevant to this article”.</p>                                 | <p>2006.</p>                                                                                                  |                                                                                                                      | <p>compliance in both the use of the devices and the reporting of injuries. An additional 15 minutes of on-site training was carried out each time a new device was tested.</p> |                                    |                                     |
| <p>Whitby 2008 [16]<br/><br/>Focus: Injury prevention and reuse</p>                                                                                                                       | <p>Safety engineered devices, including retractable syringes (VanishPoint® , a subcutaneous device).</p> | <p>Funding: not reported<br/>Conflicts of interest: not clearly reported.</p> | <p>Prospective study design. Before and after collection of data on NSI; Pre: 2000-2004; post: 2005-2006.</p> | <p>Full-time employee and part-time HCW from multiple occupational groups within the hospital including medical,</p> | <p>Introduction of the safety engineered devices.</p>                                                                                                                           | <p>Unspecified needle devices.</p> | <p>Risk of needle stick injury.</p> |

|                                                                                                                                                              |                                                                                                                                                      |                                                                                                               |                                                                                                                                      |                                                                                                                                |                                                                                                                                                 |                                                                                                                                      |                                                                                                                                                               |
|--------------------------------------------------------------------------------------------------------------------------------------------------------------|------------------------------------------------------------------------------------------------------------------------------------------------------|---------------------------------------------------------------------------------------------------------------|--------------------------------------------------------------------------------------------------------------------------------------|--------------------------------------------------------------------------------------------------------------------------------|-------------------------------------------------------------------------------------------------------------------------------------------------|--------------------------------------------------------------------------------------------------------------------------------------|---------------------------------------------------------------------------------------------------------------------------------------------------------------|
| <p>prevention</p> <p>*Also assessed needle-free intravenous systems, and safety winged butterfly needles; data provided separately for different devices</p> |                                                                                                                                                      |                                                                                                               |                                                                                                                                      | <p>nursing, hotel services, and other in an 800-bed university teaching. Princess Alexandra Hospital, Brisbane, Australia.</p> |                                                                                                                                                 |                                                                                                                                      |                                                                                                                                                               |
| <p>Van der Molen 2011[20]</p> <p>Focus: Injury prevention</p>                                                                                                | <p>Eclipse™ by Becton Dickinson. According to manufacturer website, it has a “pivoting needle technology” and a safety cover. It can be used for</p> | <p>Funding: Dutch Ministry of Social Affairs and Employment support. Conflicts of interest: not reported.</p> | <p>Three-armed cluster prospective randomized controlled trial. T0: baseline in December 2006, T1: 6 months follow-up and T2: 12</p> | <p>495 workers from 23 wards from 4 hospital divisions in the Academic Medical Center, University of Amsterdam,</p>            | <p>Introduction of an injection needle with the safety device with a needle safety workshop (one-hour interactive PowerPoint presentation).</p> | <p>Needle safety workshop without the introduction of the new device (previous device unspecified); 3<sup>rd</sup> arm (control)</p> | <p>Incidence of NSI (self-reported NSI over the previous 6 months). We did not use data from hospital register as this was not the primary outcome in the</p> |

|                                                   |                                                                                                                                         |                                                                                                           |                                                                                                                              |                                                                                                                                                                      |                                                                                                                                         |                                             |                                               |
|---------------------------------------------------|-----------------------------------------------------------------------------------------------------------------------------------------|-----------------------------------------------------------------------------------------------------------|------------------------------------------------------------------------------------------------------------------------------|----------------------------------------------------------------------------------------------------------------------------------------------------------------------|-----------------------------------------------------------------------------------------------------------------------------------------|---------------------------------------------|-----------------------------------------------|
|                                                   | both injection and blood collection.                                                                                                    |                                                                                                           | months follow-up.                                                                                                            | Netherlands (out of 796 potential participants; 62% response rate).                                                                                                  |                                                                                                                                         | did not include safety devices or workshop. | study.                                        |
| Hoffman 2013 [21]<br><br>Focus: Injury prevention | Hypodermic needles and lancets. The safety mechanism was triggered actively for the hypodermic needles while passively for the lancets. | Funding: not reported. Conflicts of interest: “authors declared that they have no Conflicts of interest”. | Most likely retrospective study. Pre and post intervention analysis of NSI rate (1 year before and 2 year after; 2007-2009). | 6493 and 6683 full-time HCWs in 2007 and 2009 respectively. Included nurses, doctors, lab technicians and students at the University Hospital Heidelberg in Germany. | Implementation of the safety devices throughout the hospital with simultaneous mandatory training for all healthcare personnel in 2008. | Unspecified needle devices.                 | Incidence of NSI (self-reported) amongst HCW. |
