# Supplementary material for: Safety engineered injection devices for intramuscular, subcutaneous and intradermal injections in healthcare delivery settings: a systematic review and meta-analysis
Source: PubMed Central journal article supplement (PMC4697323; doi:10.1186/s12912-015-0119-1), 2015-12-30
Supplement: 12912_2015_119_MOESM4_ESM.pdf [file 12912_2015_119_MOESM4_ESM.pdf]

**Additional file 4: Risk of bias in the included randomized study, with each potential source of bias judged as high, low, or unclear risk.**

| <b>Study</b>            | <b>Random sequence generation</b>                                                                              | <b>Allocation concealment</b>                                                                                                                                                    | <b>Blinding</b>                                                                                                                                               | <b>Completeness of data</b>                                                                                                                                                                                                                                                                                | <b>Intention to treat analysis</b>                                        | <b>Selective outcome reporting</b>                                                                                                      |
|-------------------------|----------------------------------------------------------------------------------------------------------------|----------------------------------------------------------------------------------------------------------------------------------------------------------------------------------|---------------------------------------------------------------------------------------------------------------------------------------------------------------|------------------------------------------------------------------------------------------------------------------------------------------------------------------------------------------------------------------------------------------------------------------------------------------------------------|---------------------------------------------------------------------------|-----------------------------------------------------------------------------------------------------------------------------------------|
| Van der Molen 2011 [20] | - Low risk<br>“The stratified allocation ... was performed using a random, computerized allocation procedure.” | -Low risk<br>“The primary researcher (HM) blindly randomized the groups for the hospital wards and workshop teachers as well as the needle supplier and the needle-use trainers” | -High risk<br>“The intervention and implementation strategy made blind group assignment impossible for the participating wards, the workers and the trainers” | -High risk<br>“The largest limitation of this study was the high proportion of workers lost to follow-up. At the cluster level, all wards remained in the study, but at the individual level 49% were lost at 12 months follow-up for the main outcome measure of self-reported NSIs compared to baseline” | -Low risk<br>“The analysis were performed on an intention-to-treat basis” | -Low risk<br>Outcomes listed in <a href="#">trial registry</a> (NTR1207) and in the methods section are reported in the results section |
